# Supplementary material for: KPNA2-Associated Immune Analyses Highlight the Dysregulation and Prognostic Effects of GRB2, NRAS, and Their RNA-Binding Proteins in Hepatocellular Carcinoma
Source: PubMed Central journal article supplement (PMC7649362; doi:10.3389/fgene.2020.593273), 2020-10-26
Supplement: Data_Sheet_1.pdf [file Data_Sheet_1.pdf]

**Table S1.** The clinical features of HCC patients from Clinical Proteomic Tumor Analysis Consortium (CPTAC).

| Variables       | CPTAC-HCC<br>(n=159) |
|-----------------|----------------------|
| Gender          | n (%)                |
| Male            | 128 (80.5%)          |
| Female          | 31 (19.5%)           |
| Age             | n (%)                |
| <=60            | 115(72.3%)           |
| >60             | 44 (27.7%)           |
| Tumor size (cm) | n (%)                |
| <=5             | 77(48.4%)            |
| >5              | 82 (51.6%)           |
| Survival status | n (%)                |
| Alive           | 99 (62.3%)           |
| Dead            | 51 (32.1%)           |
| NA              | 9 (5.6%)             |

NA, not available.

Table S2. Correlations between KPNA2 expression and BCR signaling pathway genes in HCC.

| Gene    | TCGA-HCC |                | ICGC-HCC |                |
|---------|----------|----------------|----------|----------------|
|         | <i>R</i> | <i>p</i> value | <i>R</i> | <i>p</i> value |
| GRB2    | 0.428    | 0.000E+00**    | 0.563    | 0.000E+00**    |
| PLCG2   | -0.378   | 5.063E-14**    | -0.414   | 1.783E-11**    |
| NRAS    | 0.376    | 6.128E-14**    | 0.571    | 0.000E+00**    |
| CD81    | -0.351   | 3.174E-12**    | -0.366   | 4.034E-09**    |
| CHP1    | -0.342   | 1.231E-11**    | -0.142   | 0.027          |
| PIK3R1  | -0.333   | 4.969E-11**    | -0.152   | 0.018          |
| HRAS    | 0.320    | 2.933E-10      | 0.060    | 3.492E-01      |
| NFKBIE  | 0.295    | 6.637E-09**    | 0.178    | 0.005**        |
| NFKBIA  | -0.293   | 8.831E-09**    | -0.402   | 7.480E-11**    |
| SOS2    | -0.274   | 7.904E-08**    | -0.020   | 0.755          |
| PIK3R3  | -0.266   | 1.887E-07**    | 0.004    | 0.945          |
| PPP3CA  | -0.265   | 2.106E-07**    | -0.113   | 0.078          |
| AKT1    | -0.255   | 6.636E-07**    | -0.346   | 3.096E-08**    |
| AKT2    | -0.245   | 1.787E-06**    | -0.147   | 0.022          |
| MAPK3   | 0.225    | 1.195E-05**    | 0.220    | 0.001**        |
| FOS     | -0.197   | 1.357E-04**    | -0.239   | 1.677E-04**    |
| CHP2    | 0.182    | 4.286E-04**    | 0.163    | 0.011          |
| PPP3R1  | -0.181   | 4.623E-04**    | 0.122    | 0.057          |
| AKT3    | -0.180   | 5.100E-04**    | -0.185   | 0.004**        |
| MAP2K2  | 0.177    | 6.219E-04**    | 0.061    | 0.342          |
| IFITM1  | -0.173   | 8.455E-04**    | -0.295   | 2.791E-06**    |
| BCL10   | 0.168    | 0.001**        | 0.224    | 4.213E-04**    |
| NFKB1   | -0.167   | 0.001**        | 0.019    | 0.774          |
| RAC1    | 0.162    | 0.002**        | 0.073    | 0.256          |
| NFATC2  | 0.161    | 0.002**        | 0.188    | 0.003**        |
| BLNK    | -0.154   | 0.003**        | -0.287   | 5.449E-06**    |
| PIK3R2  | 0.151    | 0.004**        | 0.373    | 1.955E-09**    |
| RAC3    | 0.147    | 0.005          | 0.172    | 0.007**        |
| NFAT5   | -0.136   | 0.009          | -0.144   | 0.025          |
| SYK     | 0.135    | 0.009          | 0.099    | 0.123          |
| PTPN6   | 0.133    | 0.010          | -0.091   | 0.158          |
| CD19    | 0.132    | 0.011          | 0.022    | 0.728          |
| VAV2    | -0.131   | 0.011          | -0.122   | 0.058          |
| MAP2K1  | -0.129   | 0.013          | 0.030    | 0.639          |
| JUN     | -0.129   | 0.013          | -0.151   | 0.019          |
| RAC2    | 0.128    | 0.014          | -0.065   | 0.315          |
| NFATC3  | -0.127   | 0.015          | -0.335   | 9.063E-08**    |
| CR2     | 0.122    | 0.019          | 0.116    | 0.072          |
| PPP3CC  | -0.119   | 0.022          | -0.187   | 0.003**        |
| NFATC1  | -0.109   | 0.036          | -0.149   | 0.020          |
| RASGRP3 | -0.100   | 0.054          | -0.176   | 0.006**        |

|         |        |       |        |             |
|---------|--------|-------|--------|-------------|
| CD22    | -0.098 | 0.060 | -0.135 | 0.036       |
| PIK3CB  | 0.095  | 0.069 | 0.281  | 8.398E-06** |
| PIK3CA  | -0.091 | 0.080 | 0.184  | 0.004**     |
| LYN     | 0.085  | 0.103 | 0.155  | 0.016       |
| MAPK1   | 0.074  | 0.154 | 0.371  | 2.446E-09** |
| PPP3R2  | 0.067  | 0.195 | 0.090  | 0.164       |
| SOS1    | -0.067 | 0.197 | 0.043  | 0.501       |
| RAF1    | 0.067  | 0.199 | 0.205  | 0.001**     |
| CD79B   | -0.055 | 0.290 | -0.019 | 0.768       |
| LILRB3  | 0.055  | 0.291 | -0.075 | 0.247       |
| INPP5D  | -0.053 | 0.310 | -0.140 | 0.030       |
| VAV1    | 0.053  | 0.313 | -0.052 | 0.420       |
| VAV3    | -0.050 | 0.341 | -0.033 | 0.611       |
| BTK     | 0.048  | 0.360 | -0.002 | 0.979       |
| NFKBIB  | 0.045  | 0.391 | -0.118 | 0.067       |
| PIK3R5  | -0.044 | 0.393 | -0.147 | 0.022       |
| MALT1   | 0.043  | 0.411 | -0.178 | 0.005**     |
| PIK3CG  | -0.043 | 0.414 | 0.113  | 0.080       |
| CD72    | 0.042  | 0.422 | -0.060 | 0.351       |
| PIK3CD  | 0.037  | 0.477 | -0.104 | 0.105       |
| KRAS    | 0.033  | 0.526 | 0.073  | 0.260       |
| PIK3AP1 | -0.033 | 0.528 | -0.094 | 0.146       |
| IKBKG   | -0.025 | 0.629 | -0.038 | 0.554       |
| GSK3B   | -0.025 | 0.631 | 0.063  | 0.325       |
| CHUK    | -0.023 | 0.658 | 0.267  | 2.508E-05** |
| NFATC4  | 0.021  | 0.682 | -0.133 | 0.038       |
| PRKCB   | -0.020 | 0.701 | 0.065  | 0.312       |
| CD79A   | -0.020 | 0.708 | -0.044 | 0.493       |
| FCGR2B  | 0.019  | 0.710 | -0.150 | 0.020       |
| IKBKB   | 0.013  | 0.808 | -0.346 | 3.068E-08** |
| RELA    | 0.009  | 0.859 | -0.103 | 0.111       |
| PPP3CB  | 0.009  | 0.865 | 0.070  | 0.274       |
| CARD11  | 0.002  | 0.977 | -0.180 | 0.005**     |
| DAPP1   | -0.001 | 0.978 | -0.016 | 0.802       |

\*\* ,  $|R| > 0.15$  and  $p < 0.01$ . Spearman correlation analysis was used and  $|R| > 0.15$  with  $p < 0.01$  was considered statistically significant.

**Table S3.** The RNA-binding proteins (RBPs)<sup>#</sup> of KPNA2, GRB2, and NRAS.

| Serial number | Gene1 | Gene2 | Gene3 | RBP       |
|---------------|-------|-------|-------|-----------|
| 1             | KPNA2 | GRB2  | NRAS  | KHDRBS2   |
| 2             | KPNA2 | GRB2  | NRAS  | HNRNPUL1  |
| 3             | KPNA2 | GRB2  | NRAS  | SMNDC1    |
| 4             | KPNA2 | GRB2  | NRAS  | ELAVL1    |
| 5             | KPNA2 | GRB2  | NRAS  | FAM120A   |
| 6             | KPNA2 | GRB2  | NRAS  | ACIN1     |
| 7             | KPNA2 | GRB2  | NRAS  | SBDS      |
| 8             | KPNA2 | GRB2  | NRAS  | GNL3      |
| 9             | KPNA2 | GRB2  | NRAS  | SRSF3     |
| 10            | KPNA2 | GRB2  | NRAS  | RBM5      |
| 11            | KPNA2 | GRB2  | NRAS  | TAF15     |
| 12            | KPNA2 | GRB2  | NRAS  | AUH       |
| 13            | KPNA2 | GRB2  | NRAS  | DGCR8     |
| 14            | KPNA2 | GRB2  | NRAS  | CNBP      |
| 15            | KPNA2 | GRB2  | NRAS  | HNRNPA1   |
| 16            | KPNA2 | GRB2  | NRAS  | ZNF184    |
| 17            | KPNA2 | GRB2  | NRAS  | EIF4G2    |
| 18            | KPNA2 | GRB2  | NRAS  | NOP56     |
| 19            | KPNA2 | GRB2  | NRAS  | CPSF6     |
| 20            | KPNA2 | GRB2  | NRAS  | LIN28     |
| 21            | KPNA2 | GRB2  | NRAS  | LARP7     |
| 22            | KPNA2 | GRB2  | NRAS  | HNRNPA2B1 |
| 23            | KPNA2 | GRB2  | NRAS  | DDX42     |
| 24            | KPNA2 | GRB2  | NRAS  | PRPF8     |
| 25            | KPNA2 | GRB2  | NRAS  | TNRC6A    |
| 26            | KPNA2 | GRB2  | NRAS  | LSM11     |
| 27            | KPNA2 | GRB2  | NRAS  | SLTM      |
| 28            | KPNA2 | GRB2  | NRAS  | KHSRP     |
| 29            | KPNA2 | GRB2  | NRAS  | KHDRBS1   |
| 30            | KPNA2 | GRB2  | NRAS  | SRSF9     |
| 31            | KPNA2 | GRB2  | NRAS  | RNF219    |
| 32            | KPNA2 | GRB2  | NRAS  | HNRNPM    |
| 33            | KPNA2 | GRB2  | NRAS  | DDX54     |
| 34            | KPNA2 | GRB2  | NRAS  | SRSF1     |
| 35            | KPNA2 | GRB2  | NRAS  | FBL       |
| 36            | KPNA2 | GRB2  | NRAS  | TARDBP    |
| 37            | KPNA2 | GRB2  | NRAS  | U2AF1     |
| 38            | KPNA2 | GRB2  | NRAS  | TROVE2    |
| 39            | KPNA2 | GRB2  | NRAS  | MOV10     |
| 40            | KPNA2 | GRB2  | NRAS  | UPF1      |
| 41            | KPNA2 | GRB2  | NRAS  | NPM1      |
| 42            | KPNA2 | GRB2  | NRAS  | LIN28B    |

---

|    |       |      |      |         |
|----|-------|------|------|---------|
| 43 | KPNA2 | GRB2 | NRAS | XRN2    |
| 44 | KPNA2 | GRB2 | NRAS | PTBP1   |
| 45 | KPNA2 | GRB2 | NRAS | FUS     |
| 46 | KPNA2 | GRB2 | NRAS | IGF2BP3 |
| 47 | KPNA2 | GRB2 | NRAS | NOP58   |
| 48 | KPNA2 | GRB2 | NRAS | ADAR    |
| 49 | KPNA2 | GRB2 | NRAS | TIA1    |
| 50 | KPNA2 | GRB2 | NRAS | HNRNPD  |
| 51 | KPNA2 | GRB2 | NRAS | RBM10   |
| 52 | KPNA2 | GRB2 | NRAS | LIN28A  |
| 53 | KPNA2 | GRB2 | NRAS | SF3A3   |
| 54 | KPNA2 | GRB2 | NRAS | KHDRBS3 |
| 55 | KPNA2 | GRB2 | NRAS | U2AF2   |
| 56 | KPNA2 | GRB2 | NRAS | BUD13   |
| 57 | KPNA2 | GRB2 | NRAS | CSTF2T  |
| 58 | KPNA2 | GRB2 | NRAS | YWHAG   |
| 59 | KPNA2 | GRB2 | NRAS | CELF2   |
| 60 | KPNA2 | GRB2 | NRAS | IGF2BP1 |
| 61 | KPNA2 | GRB2 | NRAS | HNRNPK  |
| 62 | KPNA2 | GRB2 | NRAS | FXR2    |
| 63 | KPNA2 | GRB2 | NRAS | DICER1  |
| 64 | KPNA2 | GRB2 | NRAS | METTL3  |
| 65 | KPNA2 | GRB2 | NRAS | EIF4G1  |
| 66 | KPNA2 | GRB2 | NRAS | SND1    |
| 67 | KPNA2 | GRB2 | NRAS | PCBP2   |
| 68 | KPNA2 | GRB2 | NRAS | BCCIP   |
| 69 | KPNA2 | GRB2 | NRAS | IGF2BP2 |
| 70 | KPNA2 | GRB2 | NRAS | HNRNPC  |
| 71 | KPNA2 | GRB2 | NRAS | TRA2A   |
| 72 | KPNA2 | GRB2 | NRAS | RBFOX2  |
| 73 | KPNA2 | GRB2 | NRAS | RBM47   |
| 74 | KPNA2 | GRB2 | NRAS | GTF2F1  |
| 75 | KPNA2 | GRB2 | NRAS | YTHDC1  |
| 76 | KPNA2 | GRB2 | NRAS | SF3B4   |
| 77 | KPNA2 | GRB2 | NRAS | SAFB2   |
| 78 | KPNA2 | GRB2 | NRAS | YTHDF1  |
| 79 | KPNA2 | GRB2 | NRAS | FXR1    |
| 80 | KPNA2 | GRB2 | NRAS | TIAL1   |
| 81 | KPNA2 | GRB2 | NRAS | EIF4A3  |
| 82 | KPNA2 | GRB2 | NRAS | ILF3    |
| 83 | KPNA2 | GRB2 | NRAS | SRSF10  |
| 84 | KPNA2 | GRB2 | NRAS | RANGAP1 |
| 85 | KPNA2 | GRB2 | NRAS | RBM27   |
| 86 | KPNA2 | GRB2 | NRAS | RBM22   |

---

|     |       |      |      |         |
|-----|-------|------|------|---------|
| 87  | KPNA2 | GRB2 | NRAS | FMR1    |
| 88  | KPNA2 | GRB2 | NRAS | SRSF7   |
| 89  | KPNA2 | GRB2 | NRAS | DDX3X   |
| 90  | KPNA2 | GRB2 | NRAS | NONO    |
| 91  | KPNA2 | GRB2 | NRAS | MSI2    |
| 92  | KPNA2 | GRB2 | NRAS | NUMA1   |
| 93  | KPNA2 | GRB2 | NRAS | QKI     |
| 94  | KPNA2 | GRB2 | NRAS | HNRNPU  |
| 95  | KPNA2 |      | NRAS | SLBP    |
| 96  | KPNA2 |      | NRAS | CBX7    |
| 97  | KPNA2 |      | NRAS | PUM1    |
| 98  | KPNA2 | GRB2 |      | AIFM1   |
| 99  | KPNA2 | GRB2 |      | FTO     |
| 100 | KPNA2 | GRB2 |      | DKC1    |
| 101 | KPNA2 | GRB2 |      | VIM     |
| 102 | KPNA2 | GRB2 |      | DHX9    |
| 103 | KPNA2 | GRB2 |      | HNRNPL  |
| 104 | KPNA2 |      |      | METTL14 |
| 105 | KPNA2 |      |      | RBM6    |
| 106 |       | GRB2 | NRAS | TARBP2  |
| 107 |       | GRB2 | NRAS | EWSR1   |
| 108 |       | GRB2 | NRAS | ZFP36   |
| 109 |       | GRB2 | NRAS | CAPRIN1 |
| 110 |       | GRB2 | NRAS | LARP4B  |
| 111 |       | GRB2 | NRAS | ZC3H7B  |
| 112 |       | GRB2 | NRAS | ELAVL3  |
| 113 |       | GRB2 | NRAS | MSI1    |
| 114 |       | GRB2 | NRAS | RTCB    |
| 115 |       | GRB2 | NRAS | PUM2    |
| 116 |       | GRB2 | NRAS | RC3H1   |
| 117 |       |      | NRAS | NCBP3   |
| 118 |       |      | NRAS | EIF3G   |
| 119 |       |      | NRAS | EIF3A   |
| 120 |       |      | NRAS | WTAP    |
| 121 |       |      | NRAS | EIF3D   |
| 122 |       |      | NRAS | ALYREF  |
| 123 |       | GRB2 |      | MBNL2   |

# As the data of KHDRBS2, LIN28, LSM11, LIN28A, ZFP36 and ELAVL3 were not available, only 117 RBPs were investigated in this study. RBP, RNA-binding protein.

**Table S4.** The gender-, age- and tumor size- corrected prognostic effects of the RBPs on HCC overall survival.

| RBP      | beta   | HR (95%CI)         | P value   |
|----------|--------|--------------------|-----------|
| AUH      | -0.963 | 0.382(0.211-0.691) | 0.00146** |
| SF3B4    | 1.26   | 3.51(1.56-7.9)     | 0.00237** |
| PUM2     | 1.91   | 6.74(1.94-23.4)    | 0.00266** |
| AIFM1    | -0.661 | 0.516(0.335-0.796) | 0.00279** |
| LARP4B   | 1.17   | 3.23(1.35-7.7)     | 0.00828** |
| EIF4G2   | 1.69   | 5.43(1.54-19.1)    | 0.00834** |
| TARDBP   | 1.97   | 7.2(1.6-32.4)      | 0.0101*   |
| SLBP     | 0.656  | 1.93(1.15-3.24)    | 0.0131*   |
| HNRNPA1  | 1.44   | 4.23(1.34-13.4)    | 0.0141*   |
| TIA1     | 1.41   | 4.09(1.26-13.2)    | 0.0187*   |
| YTHDF1   | 1.27   | 3.56(1.22-10.4)    | 0.02*     |
| DDX3X    | 1.31   | 3.7(1.2-11.4)      | 0.0227*   |
| HNRNPUL1 | 0.821  | 2.27(1.12-4.61)    | 0.0229*   |
| DHX9     | 1.26   | 3.53(1.18-10.6)    | 0.0242*   |
| PUM1     | 1.13   | 3.09(1.11-8.59)    | 0.0309*   |
| IGF2BP2  | 0.222  | 1.25(1.01-1.54)    | 0.0402*   |
| SF3A3    | 1.12   | 3.06(0.993-9.45)   | 0.0514    |
| MSI1     | 0.449  | 1.57(0.997-2.46)   | 0.0517    |
| FUS      | 0.59   | 1.8(0.994-3.27)    | 0.0522    |
| U2AF1    | 0.798  | 2.22(0.968-5.1)    | 0.0596    |
| CPSF6    | 1.11   | 3.02(0.896-10.2)   | 0.0745    |
| KHDRBS3  | 0.779  | 2.18(0.908-5.24)   | 0.0812    |
| U2AF2    | 1.05   | 2.86(0.868-9.41)   | 0.084     |
| HNRNPL   | 1.17   | 3.21(0.831-12.4)   | 0.0906    |
| XRN2     | 0.989  | 2.69(0.855-8.45)   | 0.0907    |
| CAPRIN1  | 0.884  | 2.42(0.866-6.76)   | 0.0918    |
| MSI2     | 0.551  | 1.73(0.907-3.32)   | 0.0962    |
| NONO     | 1.01   | 2.74(0.835-8.99)   | 0.0964    |
| SND1     | -1.04  | 0.354(0.102-1.23)  | 0.103     |
| TIAL1    | 1.13   | 3.11(0.765-12.6)   | 0.113     |
| HNRNPU   | 0.75   | 2.12(0.831-5.4)    | 0.116     |
| HNRNPM   | 1.04   | 2.84(0.753-10.7)   | 0.123     |
| RBM47    | -0.713 | 0.49(0.195-1.23)   | 0.129     |
| ILF3     | 0.731  | 2.08(0.788-5.47)   | 0.139     |
| VIM      | 0.513  | 1.67(0.846-3.3)    | 0.14      |
| EIF4A3   | 1      | 2.73(0.7-10.6)     | 0.148     |
| ALYREF   | 0.723  | 2.06(0.758-5.61)   | 0.157     |
| ADAR     | 0.559  | 1.75(0.779-3.92)   | 0.176     |
| SAFB2    | 0.64   | 1.9(0.748-4.81)    | 0.178     |
| IGF2BP3  | 0.121  | 1.13(0.942-1.35)   | 0.19      |
| DICER1   | 0.447  | 1.56(0.799-3.06)   | 0.192     |

---

|           |         |                   |       |
|-----------|---------|-------------------|-------|
| SRSF1     | 0.843   | 2.32(0.634-8.51)  | 0.203 |
| RANGAP1   | 0.532   | 1.7(0.747-3.87)   | 0.205 |
| SRSF3     | 1.03    | 2.8(0.564-13.9)   | 0.208 |
| KHDRBS1   | 0.669   | 1.95(0.669-5.69)  | 0.221 |
| SRSF10    | 0.743   | 2.1(0.637-6.93)   | 0.223 |
| RNF219    | 0.313   | 1.37(0.823-2.27)  | 0.226 |
| METTL3    | -0.538  | 0.584(0.242-1.41) | 0.232 |
| METTL14   | -0.592  | 0.553(0.208-1.47) | 0.236 |
| SMNDC1    | 0.429   | 1.54(0.744-3.17)  | 0.246 |
| HNRNPD    | 0.606   | 1.83(0.645-5.21)  | 0.256 |
| FXR1      | 0.504   | 1.66(0.694-3.95)  | 0.256 |
| CSTF2T    | 0.626   | 1.87(0.615-5.68)  | 0.27  |
| RBM22     | 0.599   | 1.82(0.627-5.29)  | 0.271 |
| RTCB      | -0.786  | 0.456(0.113-1.84) | 0.271 |
| HNRNPC    | 0.778   | 2.18(0.528-8.97)  | 0.282 |
| KHSRP     | 0.544   | 1.72(0.63-4.71)   | 0.29  |
| TNRC6A    | -0.388  | 0.679(0.326-1.41) | 0.299 |
| DGCR8     | 0.483   | 1.62(0.645-4.08)  | 0.304 |
| TARBP2    | 0.392   | 1.48(0.689-3.18)  | 0.314 |
| PRPF8     | 0.661   | 1.94(0.52-7.22)   | 0.325 |
| GNL3      | 0.316   | 1.37(0.724-2.6)   | 0.333 |
| TRA2A     | 0.529   | 1.7(0.576-5.01)   | 0.337 |
| GTF2F1    | -0.421  | 0.656(0.277-1.55) | 0.338 |
| RC3H1     | 0.349   | 1.42(0.689-2.92)  | 0.343 |
| CBX7      | -0.289  | 0.749(0.411-1.36) | 0.345 |
| CELF2     | 0.493   | 1.64(0.572-4.69)  | 0.358 |
| LARP7     | -0.559  | 0.572(0.17-1.93)  | 0.367 |
| HNRNPA2B1 | 0.593   | 1.81(0.498-6.58)  | 0.368 |
| PCBP2     | 0.612   | 1.84(0.476-7.15)  | 0.376 |
| TROVE2    | 0.398   | 1.49(0.607-3.65)  | 0.385 |
| SRSF9     | 0.269   | 1.31(0.704-2.43)  | 0.396 |
| FMR1      | 0.348   | 1.42(0.634-3.16)  | 0.396 |
| DKC1      | 0.331   | 1.39(0.614-3.16)  | 0.428 |
| FAM120A   | -0.463  | 0.63(0.199-2)     | 0.432 |
| NOP56     | 0.287   | 1.33(0.618-2.87)  | 0.464 |
| ZC3H7B    | -0.532  | 0.587(0.141-2.45) | 0.466 |
| FXR2      | 0.373   | 1.45(0.531-3.97)  | 0.467 |
| EIF4G1    | -0.394  | 0.674(0.219-2.07) | 0.491 |
| BCCIP     | 0.246   | 1.28(0.63-2.59)   | 0.496 |
| SRSF7     | 0.553   | 1.74(0.346-8.72)  | 0.502 |
| YTHDC1    | 0.346   | 1.41(0.511-3.91)  | 0.505 |
| LIN28B    | -0.0498 | 0.951(0.818-1.11) | 0.518 |
| ELAVL1    | 0.362   | 1.44(0.473-4.36)  | 0.523 |
| TAF15     | -0.311  | 0.733(0.274-1.96) | 0.536 |

---



|         |         |                   |       |
|---------|---------|-------------------|-------|
| PTBP1   | 0.362   | 1.44(0.414-4.98)  | 0.568 |
| EIF3D   | 0.425   | 1.53(0.329-7.12)  | 0.587 |
| EIF3A   | 0.399   | 1.49(0.335-6.64)  | 0.6   |
| NCBP3   | 0.233   | 1.26(0.521-3.06)  | 0.606 |
| ZNF184  | 0.182   | 1.2(0.593-2.43)   | 0.612 |
| IGF2BP1 | 0.0434  | 1.04(0.88-1.24)   | 0.619 |
| HNRNPK  | 0.378   | 1.46(0.327-6.5)   | 0.62  |
| NPM1    | 0.171   | 1.19(0.569-2.47)  | 0.648 |
| EWSR1   | -0.262  | 0.77(0.245-2.42)  | 0.654 |
| SBDS    | 0.233   | 1.26(0.453-3.52)  | 0.655 |
| DDX54   | -0.177  | 0.838(0.35-2.01)  | 0.692 |
| QKI     | -0.18   | 0.835(0.332-2.1)  | 0.702 |
| WTAP    | 0.178   | 1.19(0.474-3.01)  | 0.706 |
| BUD13   | -0.155  | 0.857(0.365-2.01) | 0.723 |
| FBL     | 0.139   | 1.15(0.53-2.49)   | 0.725 |
| RBFOX2  | 0.271   | 1.31(0.273-6.3)   | 0.735 |
| RBM5    | 0.23    | 1.26(0.329-4.82)  | 0.738 |
| NOP58   | 0.123   | 1.13(0.529-2.42)  | 0.751 |
| MOV10   | 0.0966  | 1.1(0.578-2.1)    | 0.769 |
| EIF3G   | 0.204   | 1.23(0.295-5.1)   | 0.778 |
| UPF1    | 0.157   | 1.17(0.374-3.66)  | 0.787 |
| ACIN1   | 0.154   | 1.17(0.359-3.8)   | 0.798 |
| DDX42   | 0.105   | 1.11(0.36-3.43)   | 0.855 |
| YWHAG   | -0.155  | 0.856(0.158-4.64) | 0.857 |
| RBM6    | 0.0857  | 1.09(0.372-3.19)  | 0.876 |
| FTO     | 0.0575  | 1.06(0.486-2.31)  | 0.885 |
| MBNL2   | 0.0564  | 1.06(0.462-2.42)  | 0.894 |
| CNBP    | -0.0485 | 0.953(0.464-1.96) | 0.895 |
| RBM27   | -0.052  | 0.949(0.354-2.55) | 0.918 |
| NUMA1   | -0.0225 | 0.978(0.467-2.05) | 0.952 |
| RBM10   | 0.0254  | 1.03(0.331-3.18)  | 0.965 |
| SLTM    | 0.0106  | 1.01(0.33-3.09)   | 0.985 |

\*,  $p < 0.05$ ; \*\*,  $p < 0.01$ . Multivariable cox regression analysis was used and  $p < 0.05$  was considered statistically significant.

**Figure S1**

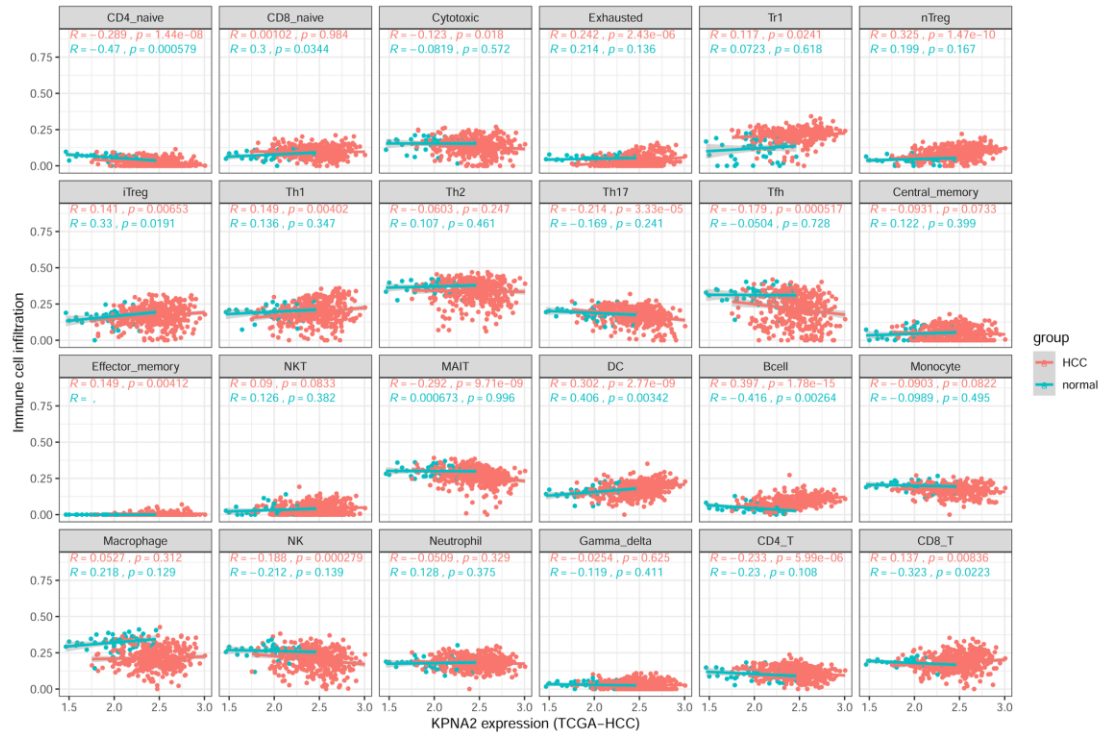

**FIGURE S1.** Correlations between KPNA2 expression and immune infiltrations in the samples of TCGA-HCC dataset. Spearman correlation analysis was used and  $|R| > 0.15$  with  $p < 0.01$  was considered statistically significant.  $R$ , correlation coefficient.

**Figure S2**

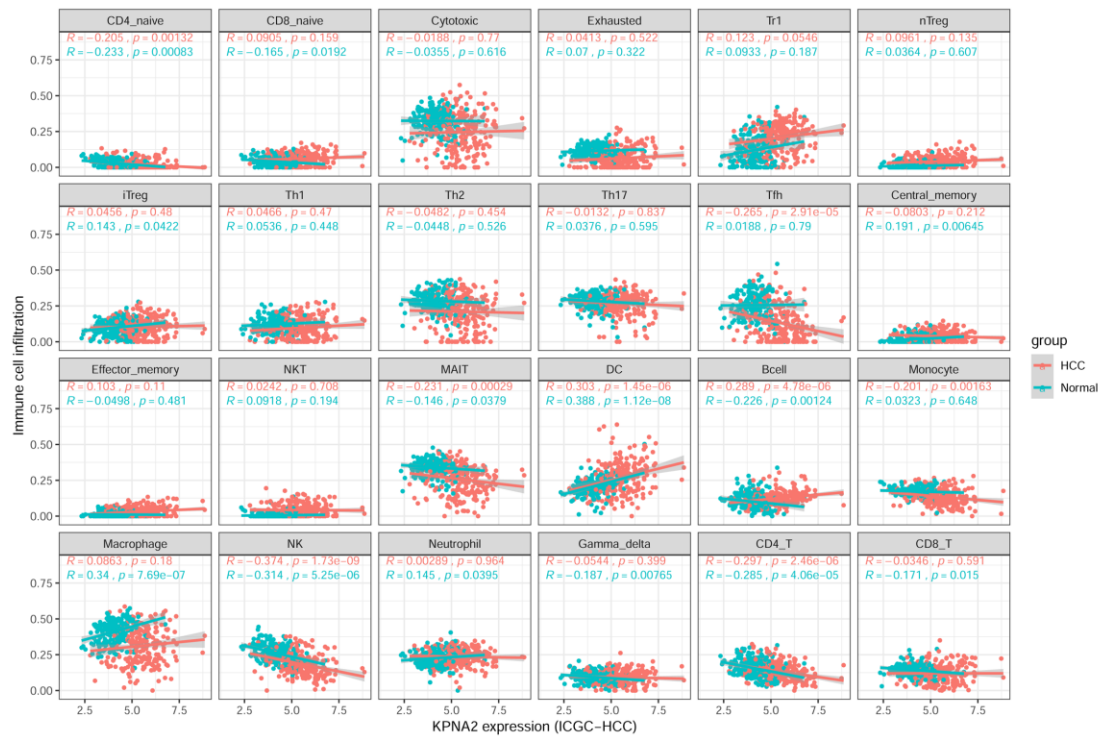

**FIGURE S2.** Correlations between KPNA2 expression and immune infiltrations in the samples of ICGC-HCC dataset. Spearman correlation analysis was used and  $|R| > 0.15$  with  $p < 0.01$  was considered statistically significant.  $R$ , correlation coefficient.

**Figure S3**

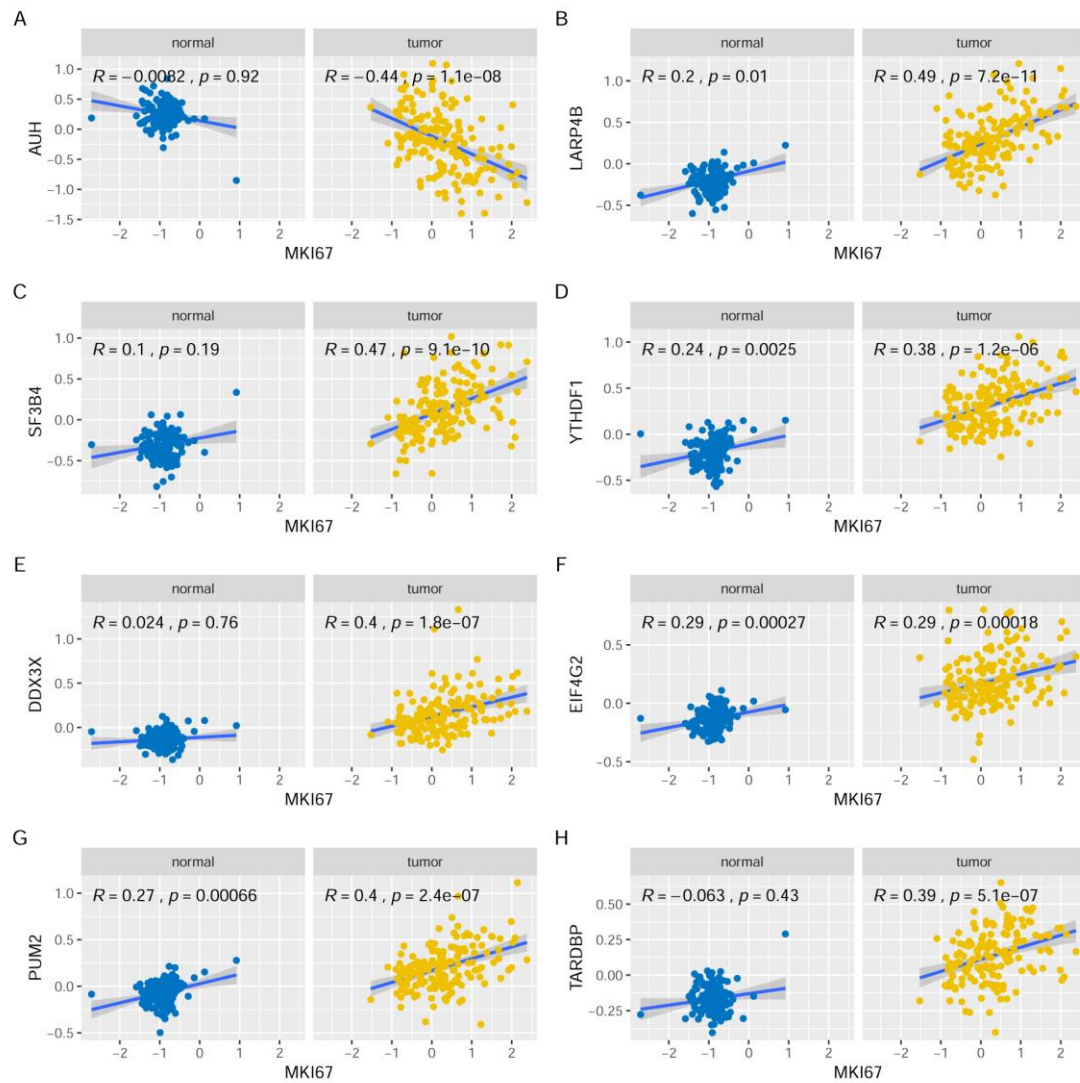

**Figure S3.** Correlations of RBPs with MKI67 in HCC tumors and normal liver tissues. Spearman correlation analysis was used and  $p < 0.05$  was considered significant.

**Figure S4**

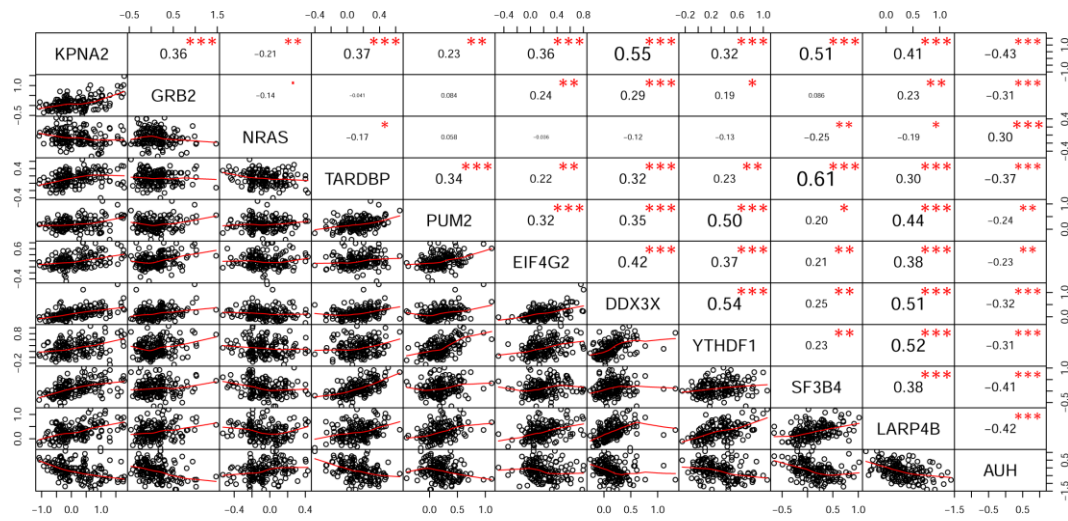

**Figure S3.** Correlations of KPNA2, GRB2, NRAS, and their RBPs in HCC at protein level. ·,  $0.05 < p < 0.10$ ; \*,  $p < 0.05$ ; \*\*,  $p < 0.01$ . Spearman correlation analysis was used and  $p < 0.05$  was considered significant.
